# Supplementary material
Source: publisher figshare collection journal article supplement (https://brill.figshare.com/articles/dataset/_/25224728)

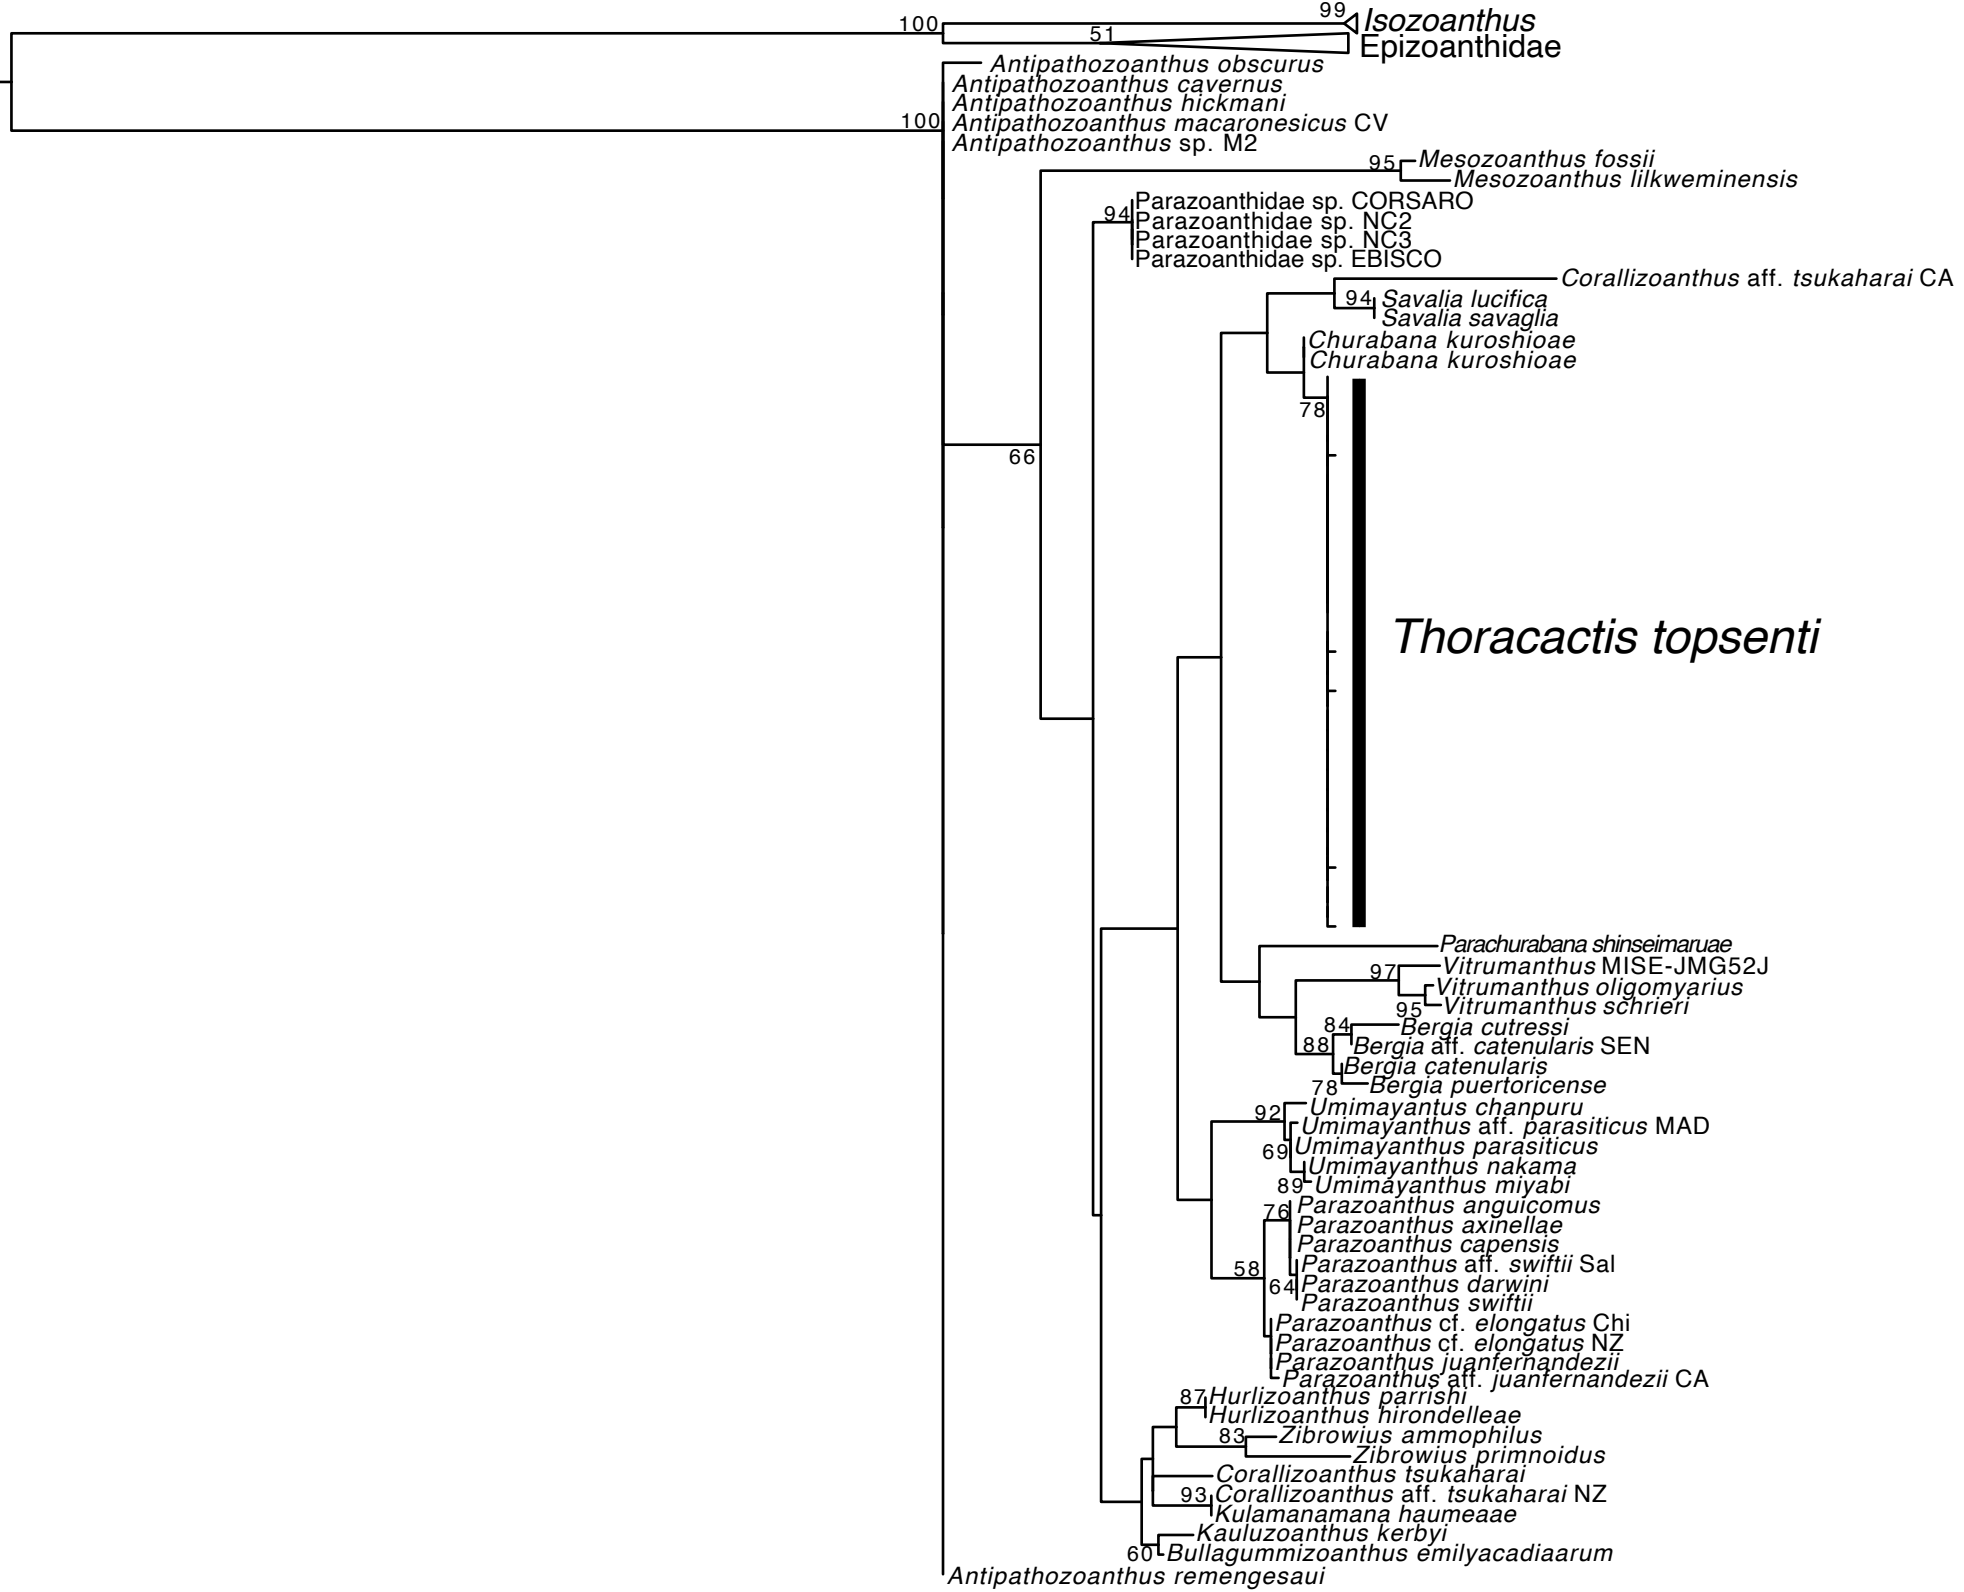

*Thoracactis topsenti*

Supplement: Supplementary file 1 [file 1]

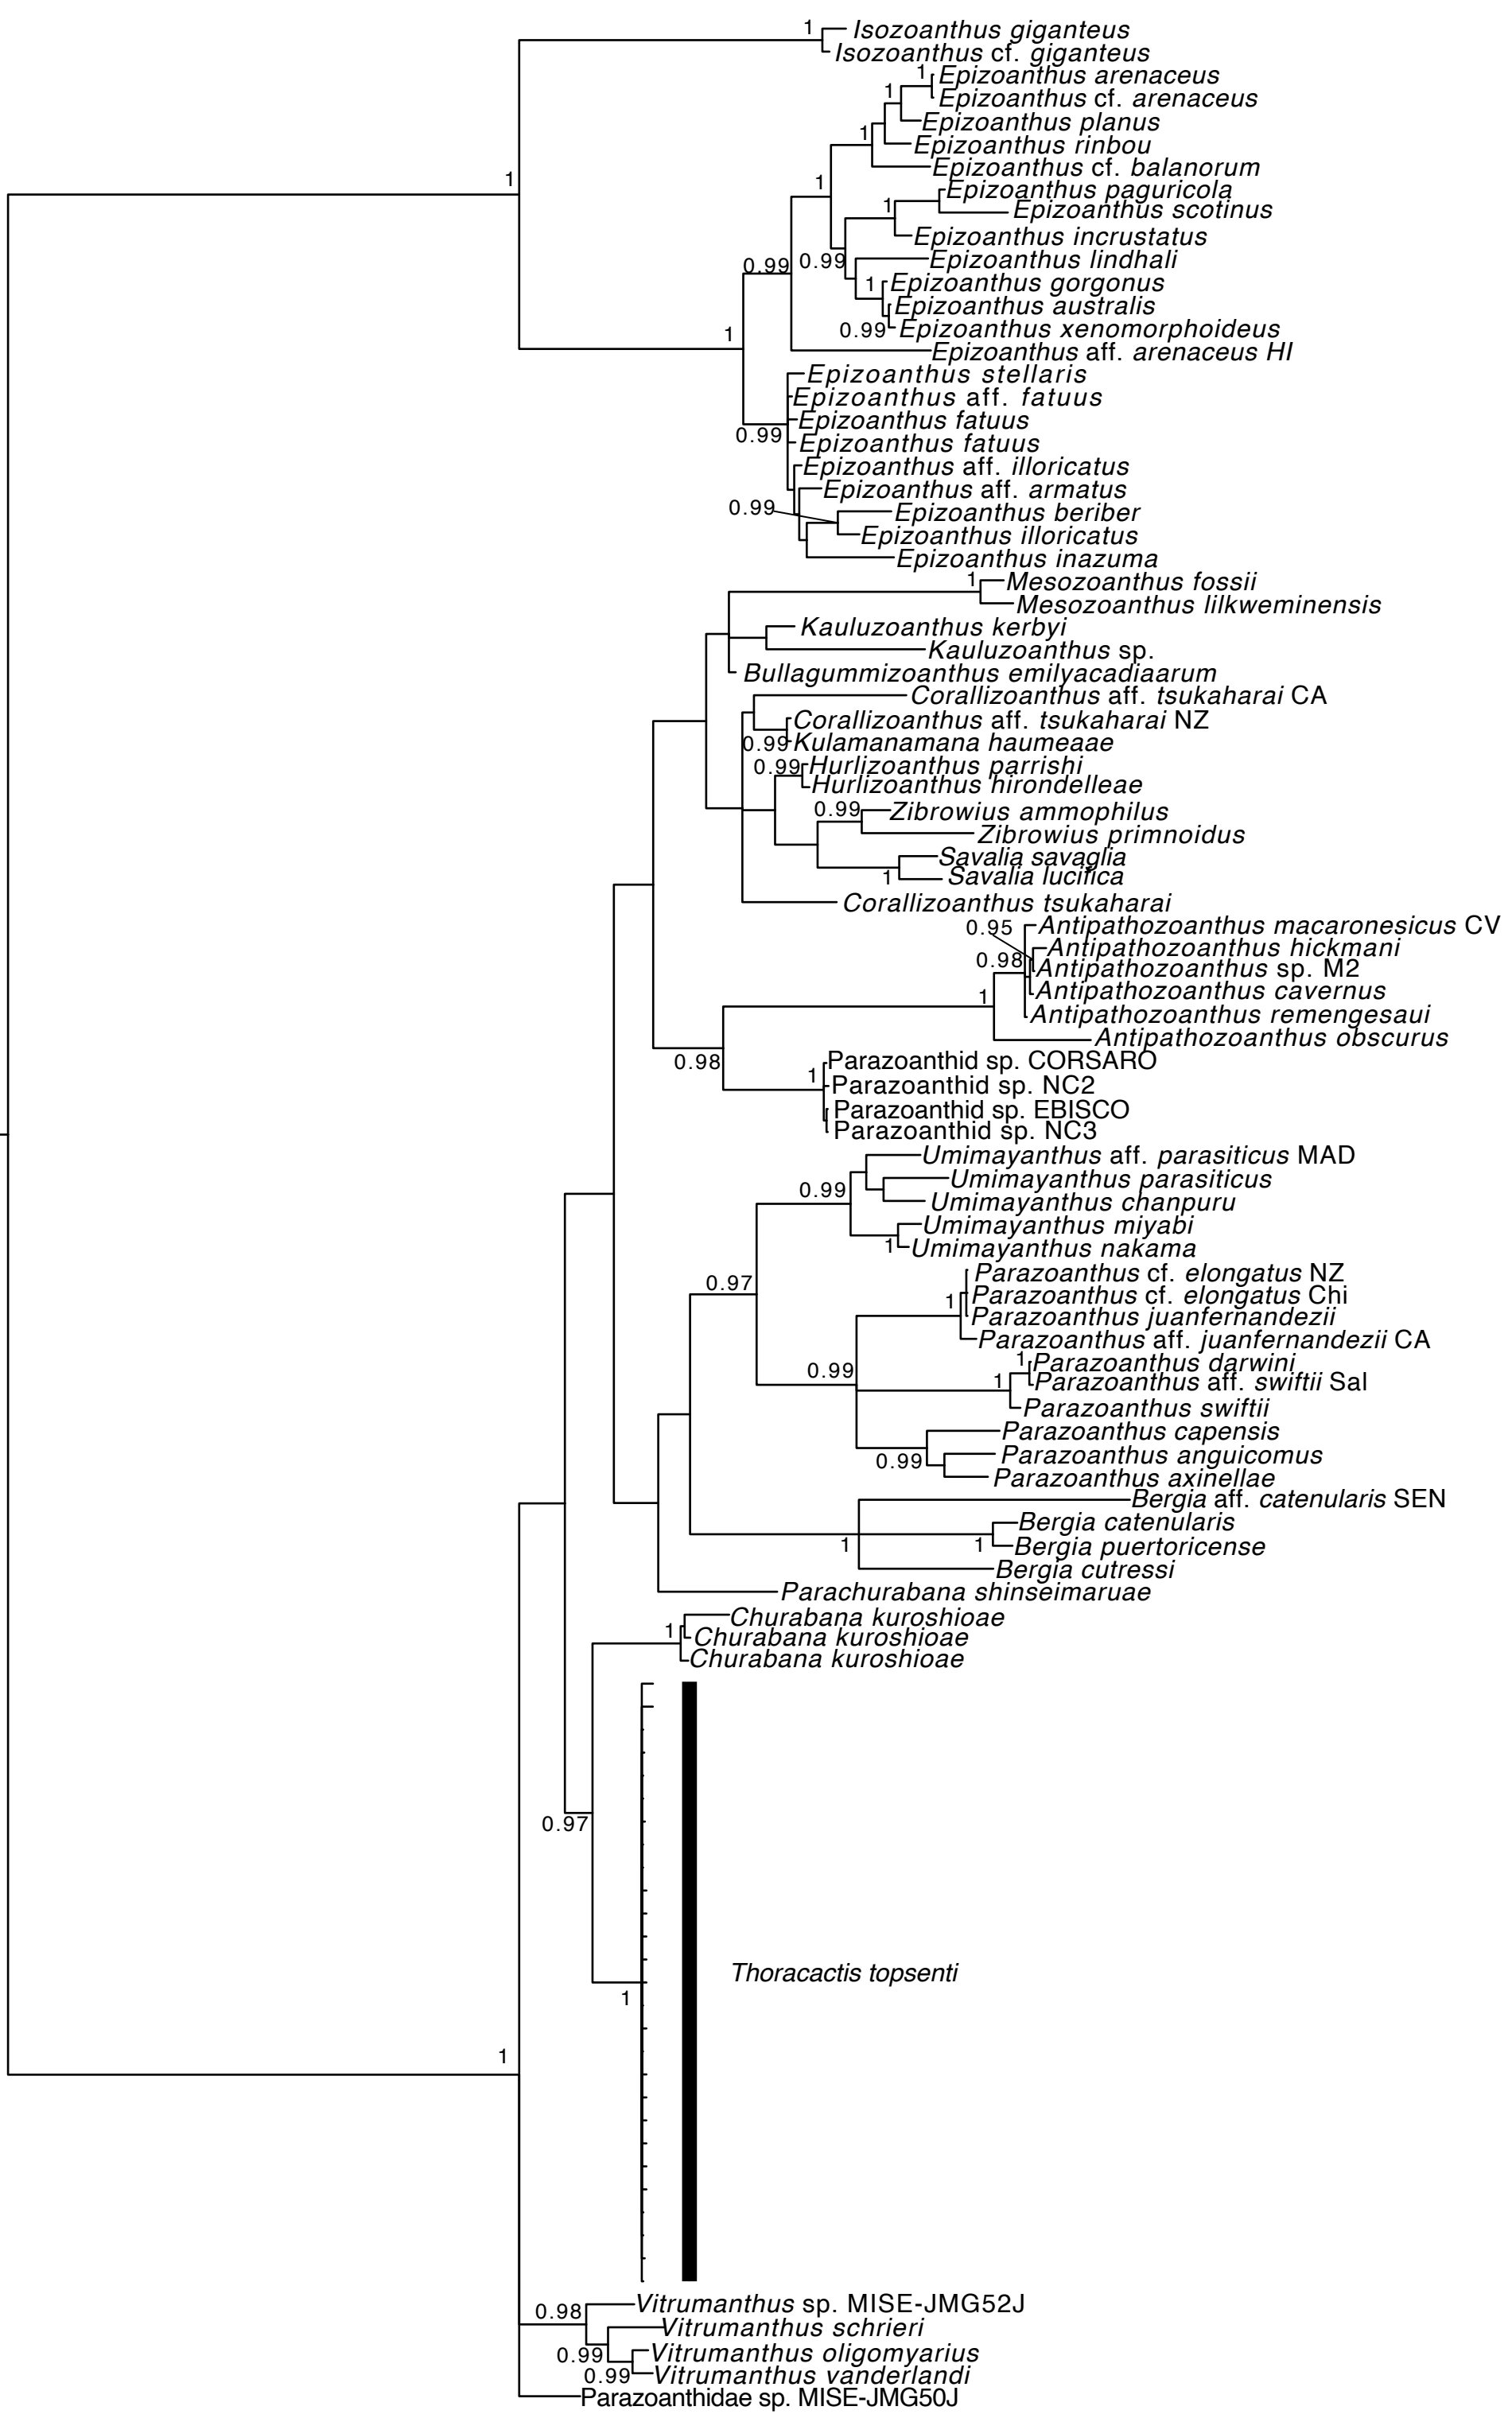

0.2

Supplement: Supplementary file 2 [file 1]

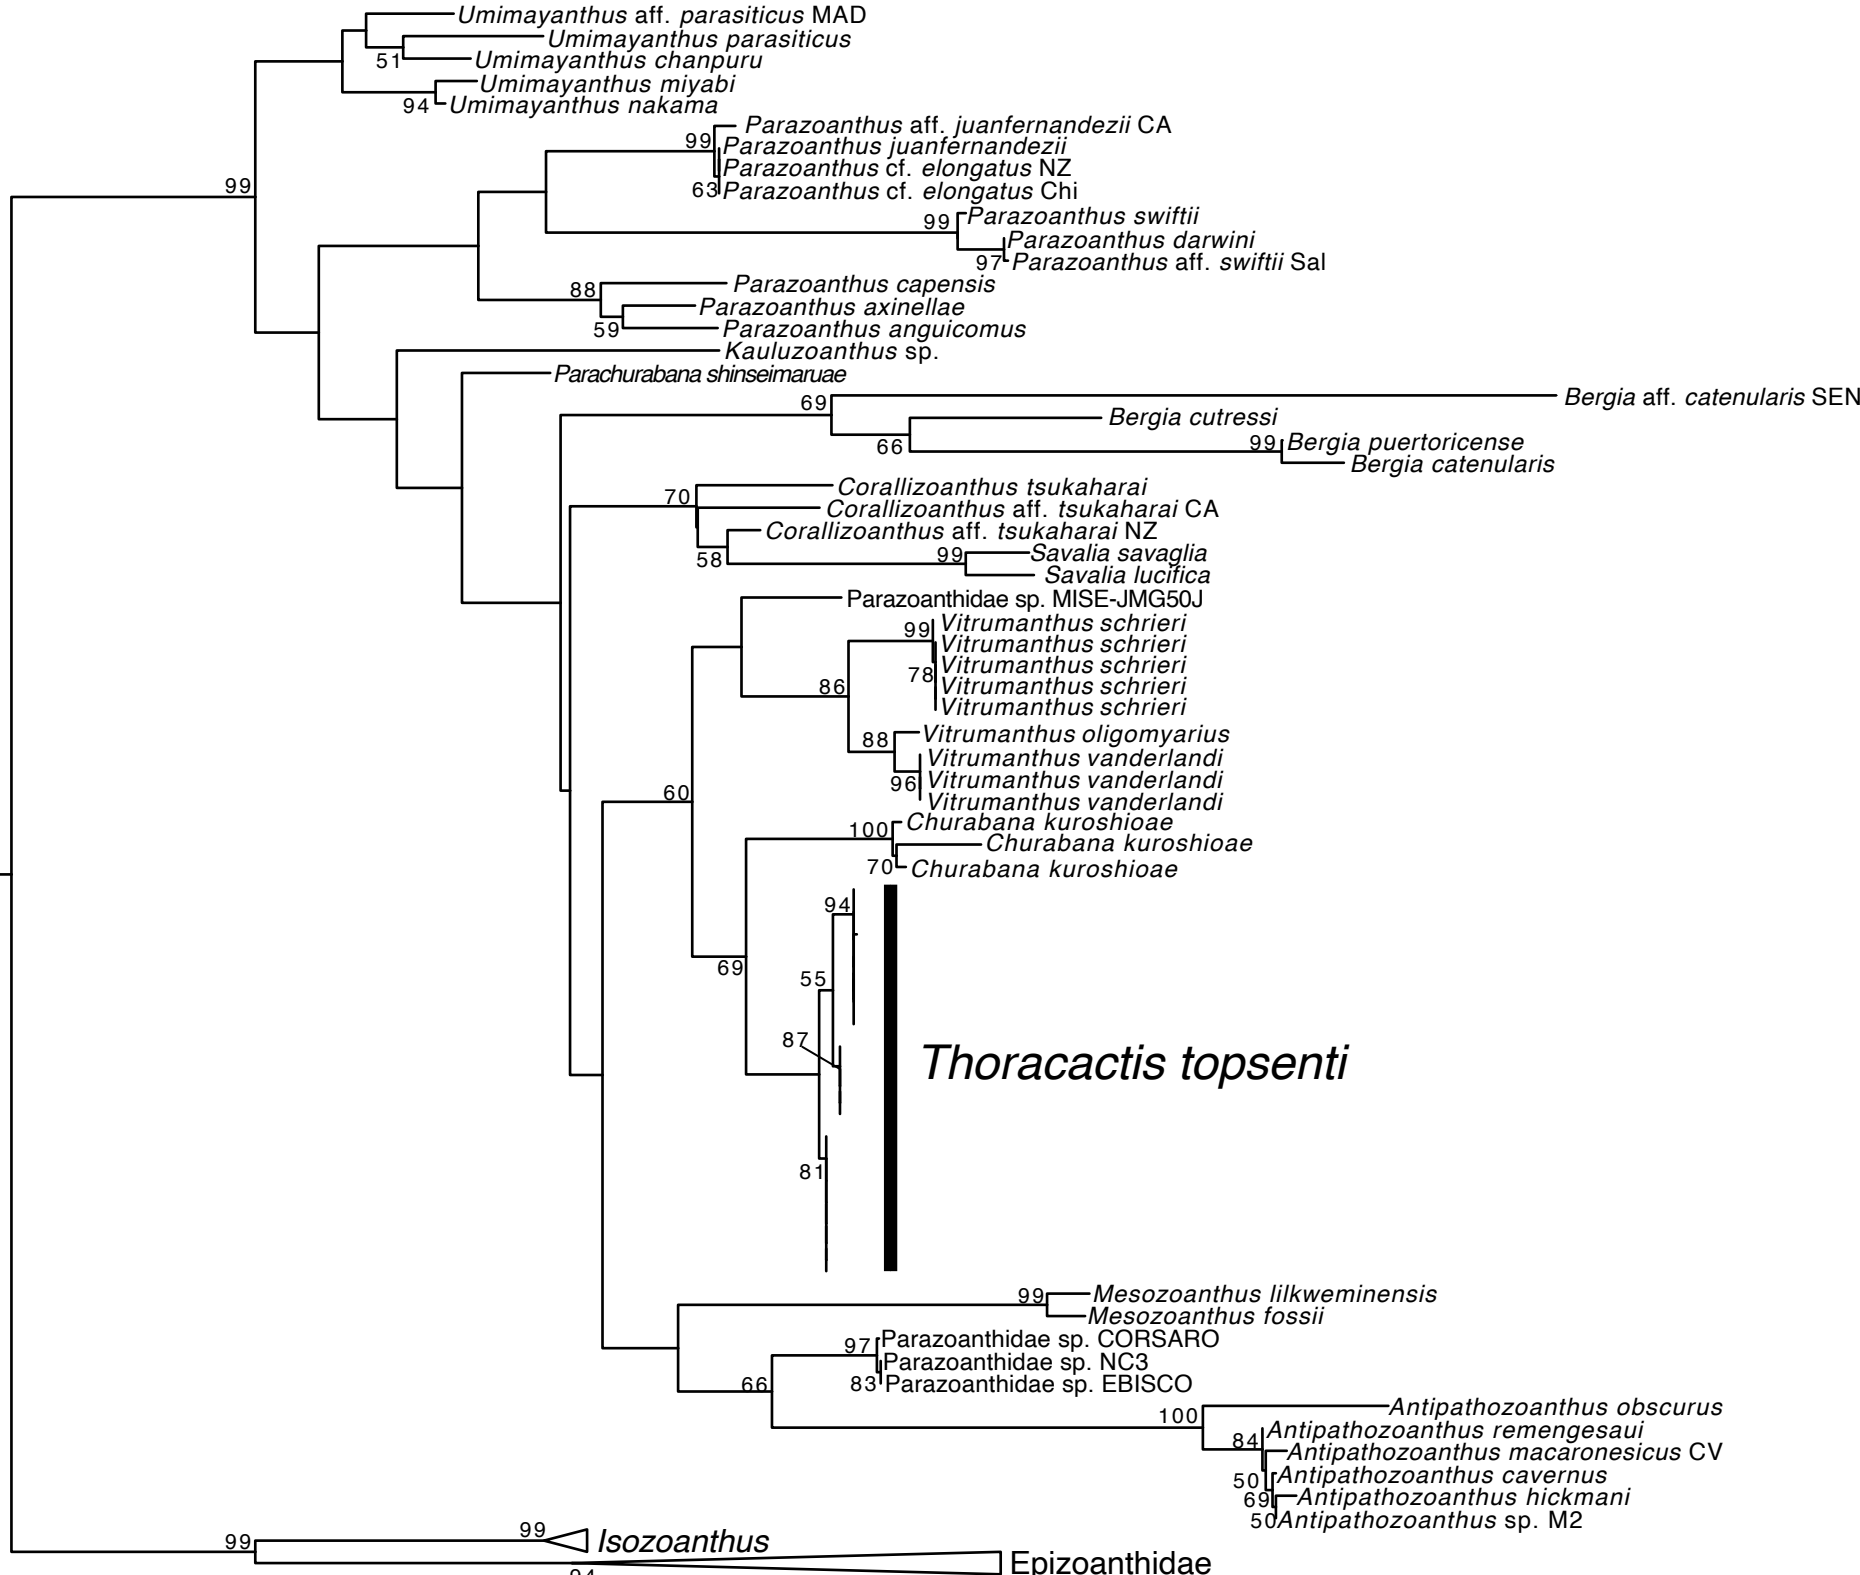

0.2

Supplement: Supplementary file 4 [file 1]

Epizoanthidae

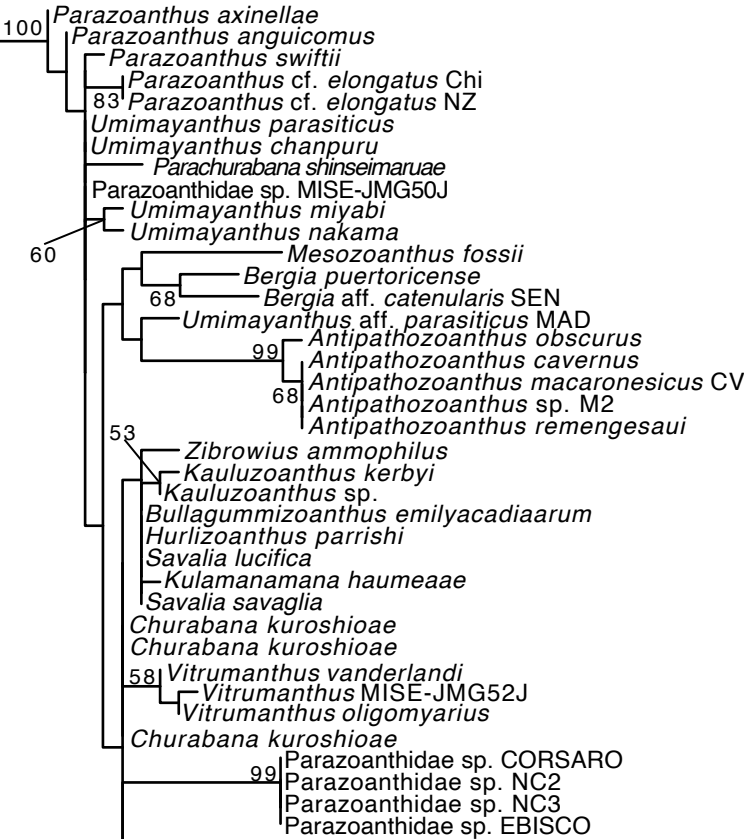

*Thoracactis topsenti*

Supplement: Supplementary file 5 [file 1]
